# Supplementary material
Source: ML conference proceedings conference paper supplement (https://openreview.net/forum?id=tPsw4NeLZx)
Supplement: supplementary_material [file attachment]

# Datasheet for the MM-WLAuslan

Paper ID: 17

June 11, 2024

## 1 Datasheets for MM-WLAuslan

This datasheet document of MM-WLAuslan contains motivation, composition, collection process, recommended uses, and so on. The motivation behind the dataset is the lack of a large-scale dataset for word-level Australian Sign Language (Auslan) recognition. Compared to other publicly available datasets, MM-WLAuslan exhibits three significant advantages: (1) the largest amount of data, (2) the most extensive vocabulary, and (3) the most diverse of multi-modal camera views. Hence, we hope this dataset will contribute to the development of Auslan and the advancement of sign languages worldwide in a broader context.

## 2 Template

### Motivation

**For what purpose was the dataset created? Was there a specific task in mind? Was there a specific gap that needed to be filled? Please provide a description.**

Considering the diversity of sign languages across geographical regions, developing region-specific ISLR datasets is crucial for supporting communication and research. Auslan, as a sign language specific to Australia, still lacks a dedicated large-scale word-level dataset for the ISLR task. MM-WLAuslan contains multi-view, multi-modal, and high-quality Auslan gloss videos, which can be investigated in various Isolated Sign Language

Recognition (ISLR) settings, including multi-view, cross-camera, and cross-view. To the best of our knowledge, MM-WLAuslan is the first publicly available large-scale word-level Auslan recognition dataset.

**Who created this dataset (e.g., which team, research group) and on behalf of which entity (e.g., company, institution, organization)?**

The dataset is collected by the UQ-CV group from the University of Queensland.

**Who funded the creation of the dataset? If there is an associated grant, please provide the name of the grantor and the grant name and number.**

The project is funded by Google and Australian Research Council (ARC).

**Any other Comments?**

None.

|                    |
|--------------------|
| <b>Composition</b> |
|--------------------|

**What do the instances that comprise the dataset represent (e.g., documents, photos, people, countries)?** Are there multiple types of instances (e.g., movies, users, and ratings; people and interactions between them; nodes and edges)? Please provide a description.

MM-WLAuslan is a multi-view and multi-model dataset for investigating different isolated sign language recognition settings. All data are recorded using three Kinect-V2 cameras and one RealSense camera.

**How many instances are there in total (of each type, if appropriate)?**

In MM-WLAuslan, there are 282,920 word-level Auslan videos.

**Does the dataset contain all possible instances or is it a sample (not necessarily random) of instances from a larger set?**

If the dataset is a sample, then what is the larger set? Is the sample representative of the larger set (e.g., geographic coverage)? If so, please describe how this representativeness was validated/verified. If it is not representative of the larger set, please describe why not (e.g., to cover a more diverse range of instances, because instances were withheld or unavailable).

MM-WLAuslan covers word-level Auslan sign videos including various categories of English words. It does not involve instances from another existing dataset.

**What data does each instance consist of? “Raw” data (e.g., unprocessed text or images) or features?** In either case, please provide a description.

MM-WLAuslan is a multi-view and multi-model dataset for investigating different isolated sign language recognition settings. All data are recorded using three Kinect-V2 cameras and one RealSense camera.

**Is there a label or target associated with each instance?** If so, please provide a description.

Yes. In MM-WLAuslan, we first identify the Auslan glosses to be recorded, and then invite Auslan experts, deaf individuals, and volunteers to participate in the recording.

**Is any information missing from individual instances?** If so, please provide a description, explaining why this information is missing (e.g., because it was unavailable). This does not include intentionally removed information, but might include, e.g., redacted text.

No.

**Are relationships between individual instances made explicit (e.g., users’ movie ratings, social network links)?** If so, please describe how these relationships are made explicit.

All the instances are independent of each other.

**Are there recommended data splits (e.g., training, development/validation, testing)?** If so, please provide a description of these splits, explaining the rationale behind them.

We provide the data splits, and the split of our dataset is used for all of

the ISLR settings (refer to Sec. 3.3 for more details).

**Are there any errors, sources of noise, or redundancies in the dataset?** If so, please provide a description.

No. Each recorded sign data is supervised and checked by at least one expert to ensure the precision of the sign language expression.

**Is the dataset self-contained, or does it link to or otherwise rely on external resources (e.g., websites, tweets, other datasets)?** If it links to or relies on external resources, a) are there guarantees that they will exist, and remain constant, over time; b) are there official archival versions of the complete dataset (i.e., including the external resources as they existed at the time the dataset was created); c) are there any restrictions (e.g., licenses, fees) associated with any of the external resources that might apply to a future user? Please provide descriptions of all external resources and any restrictions associated with them, as well as links or other access points, as appropriate.

The dataset is self-contained and we provide the source links.

**Does the dataset contain data that might be considered confidential (e.g., data that is protected by legal privilege or by doctor-patient confidentiality, data that includes the content of individuals non-public communications)?** If so, please provide a description.

No.

**Does the dataset contain data that, if viewed directly, might be offensive, insulting, threatening, or**

**might otherwise cause anxiety?** If so, please describe why.

No.

**Does the dataset relate to people?** If not, you may skip the remaining questions in this section.

Yes. MM-WLAuslan is recorded by Auslan experts, deaf individuals who use Auslan, and volunteers interested in sign language. We obtain the consent of the signers before recording them.

**Does the dataset identify any sub-populations (e.g., by age, gender)?** If so, please describe how these sub-populations are identified and provide a description of their respective distributions within the dataset.

No.

**Is it possible to identify individuals (i.e., one or more natural persons), either directly or indirectly (i.e., in combination with other data) from the dataset?** If so, please describe how.

No.

**Does the dataset contain data that might be considered sensitive in any way (e.g., data that reveals racial or ethnic origins, sexual orientations, religious beliefs, political opinions or union memberships, or locations; financial or health data; biometric or genetic data; forms of government identification, such as social security numbers; criminal history)?** If so, please provide a description.

No.

**Any other comments?**

None.

|                    |
|--------------------|
| Collection Process |
|--------------------|

**How was the data associated with each instance acquired?** Was the data directly observable (e.g., raw text, movie ratings), reported by subjects (e.g., survey responses), or indirectly inferred/derived from other data (e.g., part-of-speech tags, model-based guesses for age or language)? If data was reported by subjects or indirectly inferred/derived from other data, was the data validated/verified? If so, please describe how.

We recruit signers with diverse experience in Auslan, including Auslan experts, deaf individuals who use Auslan, and volunteers interested in sign language, to sign glosses. We then record them.

**What mechanisms or procedures were used to collect the data (e.g., hardware apparatus or sensor, manual human curation, software program, software API)?** How were these mechanisms or procedures validated?

We invite Auslan experts, deaf individuals who use Auslan, and volunteers interested in sign language to perform the sign data. We design an interactive recording interface that synchronizes three Kinect-V2 cameras and one RealSense camera. Additionally, we develop a sign language learning interface, allowing volunteers to learn and then mimic the signs.

**If the dataset is a sample from a larger set, what was the sampling strategy (e.g., deterministic, probabilistic with specific sampling probabilities)?**

MM-WLAuslan is not from a larger set.

**Who was involved in the data collection process (e.g., students,**

**crowdworkers, contractors) and how were they compensated (e.g., how much were crowdworkers paid)?**

We pay Auslan experts, deaf individuals, and volunteers \$100, \$100, and \$40 per hour, respectively.

**Over what timeframe was the data collected? Does this timeframe match the creation timeframe of the data associated with the instances (e.g., recent crawl of old news articles)?** If not, please describe the timeframe in which the data associated with the instances was created.

Our project begins in May 2023 and finishes recording in March 2024. We then spend one month on data processing.

**Were any ethical review processes conducted (e.g., by an institutional review board)?** If so, please provide a description of these review processes, including the outcomes, as well as a link or other access point to any supporting documentation.

No.

**Does the dataset relate to people?** If not, you may skip the remaining questions in this section.

Yes. MM-WLAuslan is recorded by deaf people and Australian sign language experts and volunteers.

**Did you collect the data from the individuals in question directly, or obtain it via third parties or other sources (e.g., websites)?**

We directly record the individuals performing sign language.

**Were the individuals in question notified about the data collection?**

If so, please describe (or show with screenshots or other information) how

notice was provided, and provide a link or other access point to, or otherwise reproduce, the exact language of the notification itself.

Yes.

**Did the individuals in question consent to the collection and use of their data?** If so, please describe (or show with screenshots or other information) how consent was requested and provided, and provide a link or other access point to, or otherwise reproduce, the exact language to which the individuals consented.

Yes. We obtain the consent of the signers before recording them.

**If consent was obtained, were the consenting individuals provided with a mechanism to revoke their consent in the future or for certain uses?** If so, please provide a description, as well as a link or other access point to the mechanism (if appropriate).

Yes, this is guaranteed by Auslan experts.

**Has an analysis of the potential impact of the dataset and its use on data subjects (e.g., a data protection impact analysis) been conducted?** If so, please provide a description of this analysis, including the outcomes, as well as a link or other access point to any supporting documentation.

No.

**Any other comments?**

None.

#### Preprocessing/cleaning/labeling

**Was any preprocessing/cleaning/labeling of the data done (e.g., discretization or bucketing, tokenization,**

**part-of-speech tagging, SIFT feature extraction, removal of instances, processing of missing values)?** If so, please provide a description. If not, you may skip the remainder of the questions in this section.

After recording all the sign language videos, we notice that a significant portion of the footage consists of a green screen background. We crop videos based on a fixed-size box that can cover every signer and align their eyes on the same horizontal level (refer to Sec. 3.2 for more details).

**Was the “raw” data saved in addition to the preprocessed/cleaned/labeled data (e.g., to support unanticipated future uses)?** If so, please provide a link or other access point to the “raw” data.

Yes, we provide the raw data on our website.

**Is the software used to preprocess/clean/label the instances available?** If so, please provide a link or other access point.

Both the interactive recording interface and the Auslan learning interface are designed by us.

**Any other comments?**

None.

#### Uses

**Has the dataset been used for any tasks already?** If so, please provide a description.

No, the dataset is newly proposed by us. The experiments shown in the paper are the only results available for the datasets.

**Is there a repository that links to any or all papers or systems that**

**use the dataset?** If so, please provide a link or other access point.

Yes, we provide the link to all related information on our website.

**What (other) tasks could the dataset be used for?**

Our dataset is versatile, as it is not exclusively used for various isolated sign language recognition settings but also caters to the isolated sign language production task.

**Is there anything about the composition of the dataset or the way it was collected and preprocessed/cleaned/labeled that might impact future uses?** For example, is there anything that a future user might need to know to avoid uses that could result in unfair treatment of individuals or groups (e.g., stereotyping, quality of service issues) or other undesirable harms (e.g., financial harms, legal risks) If so, please provide a description. Is there anything a future user could do to mitigate these undesirable harms?

No.

**Are there tasks for which the dataset should not be used?** If so, please provide a description.

The usage of this dataset should be limited to the scope of Auslan or isolated sign language recognition and production tasks.

**Any other comments?**

None.

#### Distribution

**Will the dataset be distributed to third parties outside of the entity (e.g., company, institution, organization) on behalf of which the**

**dataset was created?** If so, please provide a description.

No.

**How will the dataset will be distributed (e.g., tarball on website, API, GitHub) Does the dataset have a digital object identifier (DOI)?**

The dataset is accessible through our website.

**When will the dataset be distributed?**

The dataset will be released to the public upon acceptance of this paper. We provide private links for the review process.

**Will the dataset be distributed under a copyright or other intellectual property (IP) license, and/or under applicable terms of use (ToU)?** If so, please describe this license and/or ToU, and provide a link or other access point to, or otherwise reproduce, any relevant licensing terms or ToU, as well as any fees associated with these restrictions.

We release our dataset under Creative Commons BY-NC-ND 4.0 license .

**Have any third parties imposed IP-based or other restrictions on the data associated with the instances?** If so, please describe these restrictions, and provide a link or other access point to, or otherwise reproduce, any relevant licensing terms, as well as any fees associated with these restrictions.

No.

**Do any export controls or other regulatory restrictions apply to the dataset or to individual instances?**

If so, please describe these restrictions, and provide a link or other access point to, or otherwise reproduce, any supporting documentation.

No.

**Any other comments?**

None.

|                    |
|--------------------|
| <b>Maintenance</b> |
|--------------------|

**Who will be supporting/hosting/maintaining the dataset?**

The first author (the name will be released to the public upon acceptance of this paper).

**How can the owner/curator/manager of the dataset be contacted (e.g., email address)?**

E-mail addresses are at the top of the paper. (E-mail addresses will be released to the public upon acceptance of this paper).

**Is there an erratum?** If so, please provide a link or other access point.

No.

**Will the dataset be updated (e.g., to correct labeling errors, add new instances, delete instances)?** If so, please describe how often, by whom, and how updates will be communicated to users (e.g., mailing list, GitHub)?

No. We have completed the recording of all data.

**If the dataset relates to people, are there applicable limits on the retention of the data associated with the instances (e.g., were individuals in question told that their data would be retained for a fixed period of time and then deleted)?** If so, please describe these limits and explain how they will be enforced.

No.

**Will older versions of the dataset continue to be supported/hosted/maintained?** If so, please describe how. If not, please describe how its obsolescence will be communicated to users.

Yes, older versions of the benchmark will be maintained on our website.

**If others want to extend/augment/build on/contribute to the dataset, is there a mechanism for them to do so?** If so, please provide a description. Will these contributions be validated/verified? If so, please describe how. If not, why not? Is there a process for communicating/distributing these contributions to other users? If so, please provide a description.

Yes, errors may be submitted to us through email.

**Any other comments?**

None.
